# Supplementary material for: The Multikinase Inhibitor AD80 Induces Mitotic Catastrophe and Autophagy in Pancreatic Cancer Cells
Source: MDPI journal article supplement (doi:10.3390/cancers15153866), 2023-07-29
Supplement: s1 [file s1]

**Supplementary Table S1.** Primer sequences and concentrations.

| <b>Gene</b>    | <b>Sequence</b>                                           | <b>Concentration</b> |
|----------------|-----------------------------------------------------------|----------------------|
| <i>BBC3</i>    | FW: GACCTCAACGCACAGTACGAG<br>RV: AGGAGTCCCATGATGAGATTG    | 300 nM               |
| <i>BCL2L11</i> | FW: ATGTCTGACTCTGACTCTCG<br>RV: CCTTGTGGCTCTGTCTGTAG      | 300 nM               |
| <i>CDKN1A</i>  | FW: TGTCACTGTCTTGTACCCTTGT<br>RV: GCCGGCGTTTGGAGTGGTAG    | 300 nM               |
| <i>CDKN1B</i>  | FW: ACTCTGAGGACACGCATTTGGT<br>RV: TCTGTTCTGTTGGCTCTTTTGTT | 300 nM               |
| <i>GADD45A</i> | FW: AAGGATGGATAAGGTGGGG<br>RV: CTGGATCAGGGTGAAGTGG        | 300 nM               |
| <i>PMAIP1</i>  | FW: CGCGCAAGAACGCTCAACC<br>RV: CCACTCGACTTCCAGCTCTGCT     | 300 nM               |
| <i>ACTB</i>    | FW: AGGCCAACCGCGAGAAG<br>RV: ACAGCCTGGATAGCAACGTACA       | 150 nM               |
| <i>HPRT1</i>   | FW: GAACGTCTTGCTCGAGATGTGA<br>RV: TCCAGCAGGTCAGCAAAGAAT   | 150 nM               |
