# Supplementary material for: The Multikinase Inhibitor AD80 Induces Mitotic Catastrophe and Autophagy in Pancreatic Cancer Cells
Source: MDPI journal article supplement (doi:10.3390/cancers15153866), 2023-07-29
Supplement: s1 [file s1]

## HPDE cells

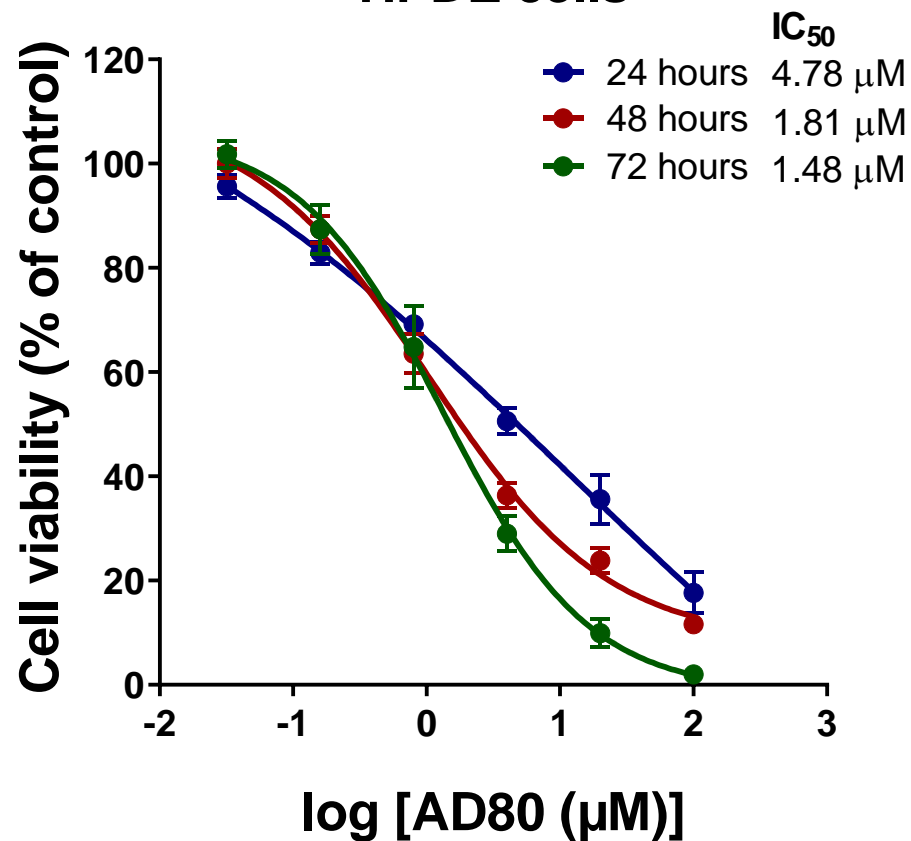

## Selectivity Index (compared to HPDE cells)

| Time     | MIA PaCa 2 cells | PANC-1 cells | AsPC-1 cells |
|----------|------------------|--------------|--------------|
| 24 hours | 0.39             | 0.16         | 0.11         |
| 48 hours | 3.48             | 0.23         | 1.22         |
| 72 hours | 18.50            | 0.33         | 4.48         |
