# Supplementary material for: The Multikinase Inhibitor AD80 Induces Mitotic Catastrophe and Autophagy in Pancreatic Cancer Cells
Source: MDPI journal article supplement (doi:10.3390/cancers15153866), 2023-07-29
Supplement: s1 [file s1]

**Supplementary Table S2.** PCR array results for autophagy-related genes upon AD80 exposure in PANC-1 cells.

| Genes           | AD80-treated PANC-1 cells |      |      | FC mean <sup>1</sup> | SD   | p <sup>2</sup> |
|-----------------|---------------------------|------|------|----------------------|------|----------------|
|                 | #1                        | #2   | #3   |                      |      |                |
| <i>SQSTM1</i>   | 0.71                      | 0.67 | 0.78 | 0.72                 | 0.06 | 0.001          |
| <i>HSPA8</i>    | 0.64                      | 0.85 | 0.76 | 0.75                 | 0.11 | 0.016          |
| <i>HSP90AA1</i> | 0.93                      | 0.73 | 0.82 | 0.83                 | 0.10 | 0.038          |
| <i>FADD</i>     | 0.79                      | 0.95 | 0.75 | 0.83                 | 0.10 | 0.048          |
| <i>BID</i>      | 0.67                      | 1.00 | 0.84 | 0.84                 | 0.16 | 0.155          |
| <i>RGS19</i>    | 0.94                      | 0.86 | 0.75 | 0.85                 | 0.10 | 0.056          |
| <i>ATG3</i>     | 0.86                      | 0.76 | 0.97 | 0.86                 | 0.10 | 0.081          |
| <i>ATG4A</i>    | 0.87                      | 0.74 | 1.00 | 0.87                 | 0.13 | 0.166          |
| <i>BAD</i>      | 1.02                      | 0.72 | 0.87 | 0.87                 | 0.15 | 0.214          |
| <i>BAX</i>      | 1.02                      | 0.75 | 0.91 | 0.89                 | 0.13 | 0.241          |
| <i>NPC1</i>     | 1.15                      | 0.70 | 1.04 | 0.97                 | 0.23 | 0.813          |
| <i>HDAC1</i>    | 1.00                      | 0.99 | 0.92 | 0.97                 | 0.05 | 0.283          |
| <i>SNCA</i>     | 0.70                      | 1.23 | 0.99 | 0.97                 | 0.26 | 0.865          |
| <i>NFKB1</i>    | 1.11                      | 0.87 | 0.97 | 0.98                 | 0.12 | 0.802          |
| <i>CASP3</i>    | 0.94                      | 1.04 | 0.97 | 0.98                 | 0.05 | 0.596          |
| <i>ATG7</i>     | 0.98                      | 0.96 | 1.01 | 0.98                 | 0.02 | 0.257          |
| <i>CLN3</i>     | 1.28                      | 0.85 | 0.85 | 0.99                 | 0.25 | 0.957          |
| <i>ATG5</i>     | 1.01                      | 1.00 | 1.05 | 1.02                 | 0.03 | 0.301          |
| <i>ATG12</i>    | 0.86                      | 1.12 | 1.09 | 1.02                 | 0.14 | 0.791          |
| <i>RB1</i>      | 1.03                      | 1.05 | 1.01 | 1.03                 | 0.02 | 0.041          |
| <i>PTEN</i>     | 0.92                      | 0.96 | 1.23 | 1.04                 | 0.17 | 0.732          |
| <i>BAK1</i>     | 1.19                      | 0.79 | 1.17 | 1.05                 | 0.22 | 0.700          |
| <i>EIF4G1</i>   | 1.25                      | 0.93 | 0.99 | 1.06                 | 0.17 | 0.602          |
| <i>TP53</i>     | 1.21                      | 0.95 | 1.01 | 1.06                 | 0.14 | 0.488          |
| <i>ATG9B</i>    | 0.30                      | 1.57 | 1.31 | 1.06                 | 0.67 | 0.882          |
| <i>BCL2L1</i>   | 1.28                      | 0.98 | 0.98 | 1.08                 | 0.18 | 0.476          |
| <i>ATG4C</i>    | 1.06                      | 0.98 | 1.22 | 1.08                 | 0.12 | 0.299          |
| <i>PRKAA1</i>   | 0.94                      | 1.13 | 1.26 | 1.11                 | 0.16 | 0.308          |
| <i>HDAC6</i>    | 1.29                      | 0.89 | 1.20 | 1.13                 | 0.21 | 0.346          |
| <i>MTOR</i>     | 1.03                      | 1.06 | 1.31 | 1.13                 | 0.16 | 0.214          |
| <i>ULK1</i>     | 1.45                      | 0.99 | 1.05 | 1.16                 | 0.25 | 0.312          |
| <i>AKT1</i>     | 1.36                      | 1.01 | 1.13 | 1.17                 | 0.18 | 0.180          |
| <i>CASP8</i>    | 1.32                      | 0.97 | 1.23 | 1.17                 | 0.18 | 0.181          |
| <i>MAPK8</i>    | 1.12                      | 1.20 | 1.28 | 1.20                 | 0.08 | 0.011          |
| <i>CTSS</i>     | 1.01                      | 1.90 | 0.70 | 1.20                 | 0.63 | 0.606          |
| <i>BNIP3</i>    | 1.05                      | 0.98 | 1.59 | 1.21                 | 0.33 | 0.341          |
| <i>UVRAG</i>    | 1.56                      | 0.98 | 1.13 | 1.23                 | 0.30 | 0.264          |
| <i>DRAM2</i>    | 1.21                      | 1.14 | 1.34 | 1.23                 | 0.10 | 0.018          |
| <i>MAP1LC3B</i> | 0.72                      | 1.77 | 1.21 | 1.23                 | 0.52 | 0.484          |
| <i>GABARAP</i>  | 1.32                      | 1.18 | 1.30 | 1.27                 | 0.08 | 0.004          |
| <i>ATG16L1</i>  | 1.36                      | 1.07 | 1.39 | 1.27                 | 0.18 | 0.056          |
| <i>ESR1</i>     | 0.48                      | 1.28 | 2.07 | 1.27                 | 0.79 | 0.582          |
| <i>HGS</i>      | 1.35                      | 1.09 | 1.38 | 1.28                 | 0.16 | 0.040          |
| <i>BCL2</i>     | 2.42                      | 0.61 | 0.81 | 1.28                 | 0.99 | 0.653          |

|                  |      |      |      |      |      |       |
|------------------|------|------|------|------|------|-------|
| <i>ULK2</i>      | 1.15 | 1.26 | 1.50 | 1.30 | 0.18 | 0.042 |
| <i>AMBRA1</i>    | 1.39 | 1.19 | 1.33 | 1.30 | 0.10 | 0.007 |
| <i>PIK3R4</i>    | 1.37 | 1.13 | 1.42 | 1.31 | 0.15 | 0.026 |
| <i>ATG9A</i>     | 1.88 | 1.09 | 1.04 | 1.33 | 0.47 | 0.290 |
| <i>GABARAPL2</i> | 1.16 | 1.50 | 1.51 | 1.39 | 0.20 | 0.027 |
| <i>TGFB1</i>     | 1.65 | 1.24 | 1.31 | 1.40 | 0.22 | 0.035 |
| <i>CDKN1B</i>    | 1.39 | 1.25 | 1.57 | 1.40 | 0.16 | 0.012 |
| <i>ATG4B</i>     | 1.34 | 1.34 | 1.57 | 1.42 | 0.13 | 0.006 |
| <i>TMEM74</i>    | 1.12 | 1.99 | 1.14 | 1.42 | 0.50 | 0.221 |
| <i>HTT</i>       | 1.80 | 1.30 | 1.26 | 1.45 | 0.30 | 0.058 |
| <i>BECN1</i>     | 1.65 | 1.39 | 1.33 | 1.46 | 0.17 | 0.009 |
| <i>ATG4D</i>     | 1.10 | 0.61 | 2.72 | 1.48 | 1.10 | 0.494 |
| <i>DRAM1</i>     | 1.47 | 1.58 | 1.55 | 1.53 | 0.06 | 0.000 |
| <i>RAB24</i>     | 1.57 | 1.36 | 1.75 | 1.56 | 0.20 | 0.008 |
| <i>CTSB</i>      | 1.80 | 1.50 | 1.42 | 1.57 | 0.20 | 0.008 |
| <i>EIF2AK3</i>   | 1.67 | 1.32 | 1.86 | 1.62 | 0.28 | 0.019 |
| <i>GABARAPL1</i> | 1.93 | 1.60 | 1.41 | 1.65 | 0.26 | 0.013 |
| <i>TGM2</i>      | 1.72 | 1.35 | 2.06 | 1.71 | 0.36 | 0.026 |
| <i>ATG10</i>     | 0.97 | 1.48 | 2.72 | 1.72 | 0.90 | 0.237 |
| <i>APP</i>       | 2.07 | 1.53 | 1.66 | 1.75 | 0.28 | 0.010 |
| <i>RPS6KB1</i>   | 1.57 | 1.33 | 2.68 | 1.86 | 0.72 | 0.106 |
| <i>LAMP1</i>     | 2.42 | 1.54 | 1.78 | 1.91 | 0.46 | 0.026 |
| <i>CTSD</i>      | 2.03 | 1.64 | 2.11 | 1.93 | 0.26 | 0.003 |
| <i>FAS</i>       | 1.55 | 1.51 | 2.91 | 1.99 | 0.80 | 0.099 |
| <i>PIK3C3</i>    | 2.04 | 1.60 | 2.52 | 2.05 | 0.46 | 0.017 |
| <i>ATG16L2</i>   | 1.90 | 1.59 | 2.93 | 2.14 | 0.70 | 0.049 |
| <i>MAPK14</i>    | 1.10 | 4.63 | 1.12 | 2.29 | 2.03 | 0.335 |
| <i>WIP1</i>      | 2.86 | 2.96 | 2.23 | 2.68 | 0.39 | 0.002 |
| <i>GAA</i>       | 3.45 | 2.69 | 2.71 | 2.95 | 0.43 | 0.002 |
| <i>MAP1LC3A</i>  | 3.52 | 2.84 | 3.29 | 3.22 | 0.34 | 0.000 |
| <i>IRGM</i>      | 3.83 | 5.04 | 3.96 | 4.28 | 0.67 | 0.001 |
| <i>CXCR4</i>     | 7.99 | 2.62 | 3.40 | 4.67 | 2.90 | 0.093 |
| <i>TNFSF10</i>   | 9.62 | 3.05 | 5.56 | 6.08 | 3.32 | 0.057 |
| <i>CDKN2A</i>    | ND   | ND   | ND   | -    | -    | -     |
| <i>DAPK1</i>     | ND   | ND   | ND   | -    | -    | -     |
| <i>IFNG</i>      | ND   | ND   | ND   | -    | -    | -     |
| <i>IGF1</i>      | ND   | ND   | ND   | -    | -    | -     |
| <i>INS</i>       | ND   | ND   | ND   | -    | -    | -     |
| <i>PIK3CG</i>    | ND   | ND   | ND   | -    | -    | -     |
| <i>TNF</i>       | ND   | ND   | ND   | -    | -    | -     |

Abbreviation: FC. Fold-change; SD. standard deviation; ND. not detected.

<sup>1</sup>Fold-change of vehicle-treated cells.

<sup>2</sup>Student *t* test.
