# Supplementary material for: The Multikinase Inhibitor AD80 Induces Mitotic Catastrophe and Autophagy in Pancreatic Cancer Cells
Source: MDPI journal article supplement (doi:10.3390/cancers15153866), 2023-07-29
Supplement: s1 [file s1]

## PANC-1 cells

|                     |   |   |    |    |
|---------------------|---|---|----|----|
| AD80 ( $\mu$ M)     | - | 1 | -  | 1  |
| Bafilomycin A1 (nM) | - | - | 10 | 10 |

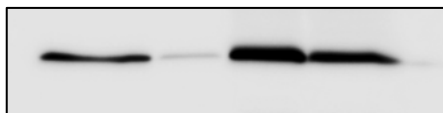

**IB: SQSTM1/p62**  
62 kDa

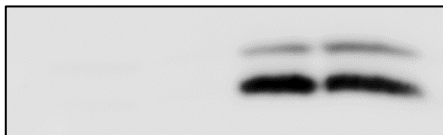

**IB: LC3B**  
Short exposure  
14,19 kDa

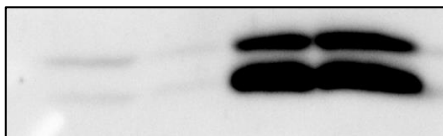

**IB: LC3B**  
Long exposure  
14,19 kDa

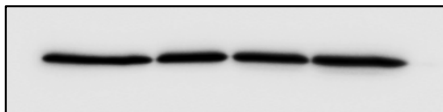

**IB:  $\alpha$ -tubulin**  
55 kDa
