# Supplementary material for: The Multikinase Inhibitor AD80 Induces Mitotic Catastrophe and Autophagy in Pancreatic Cancer Cells
Source: MDPI journal article supplement (doi:10.3390/cancers15153866), 2023-07-29
Supplement: s1 [file s1]

Merged Marker

Blot

Merged Marker

Blot

Merged Marker

Blot

MIA PaCa-2 cells  
AD80 (μM) - 0.25 0.5 1

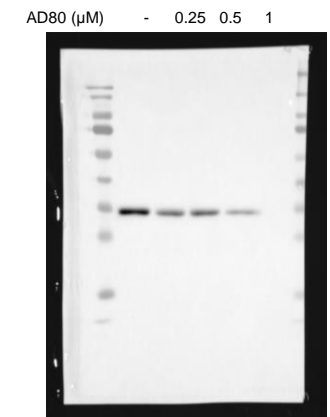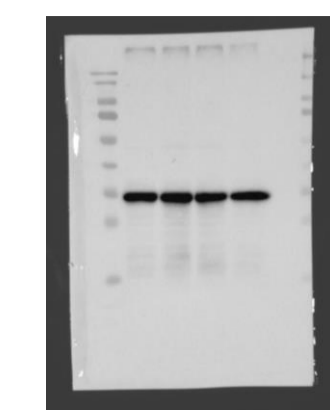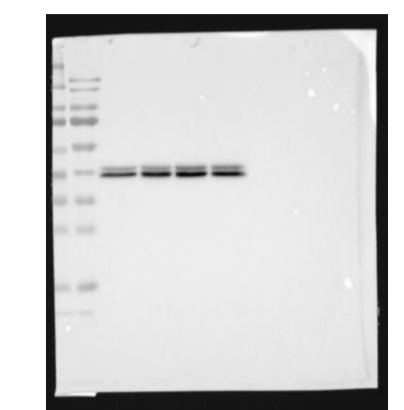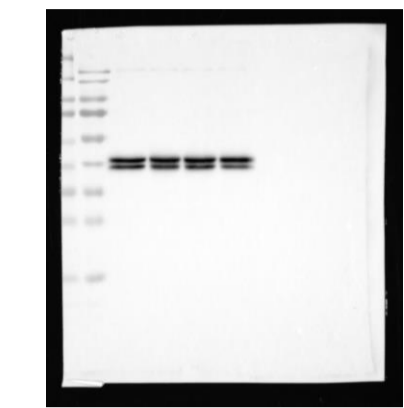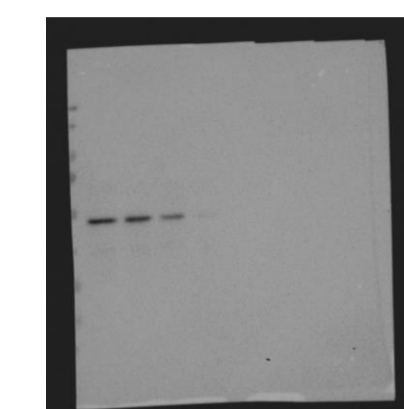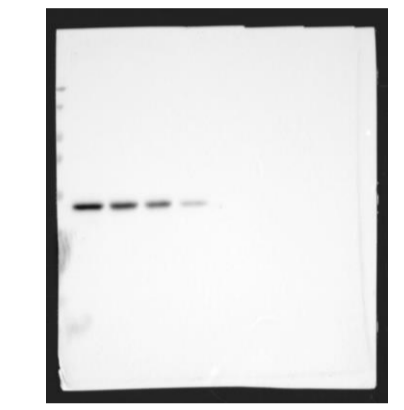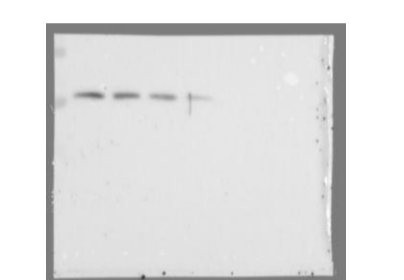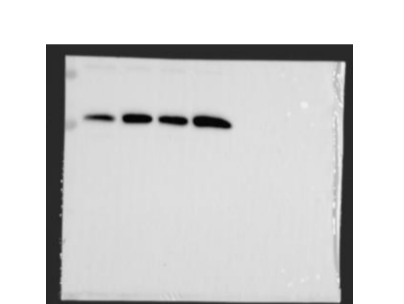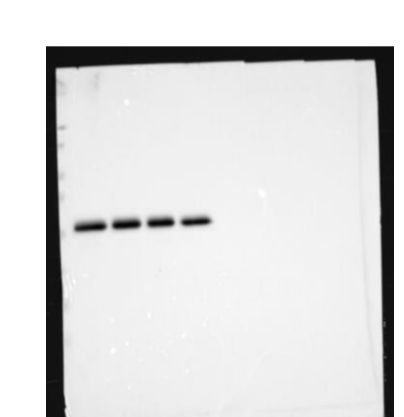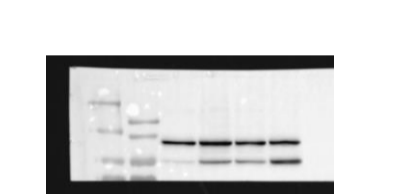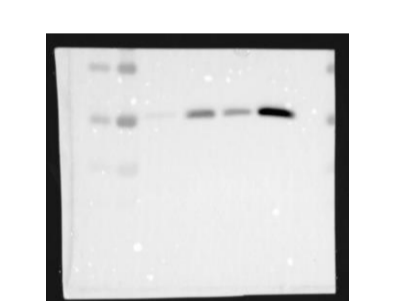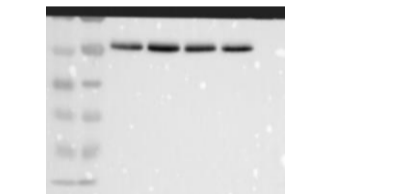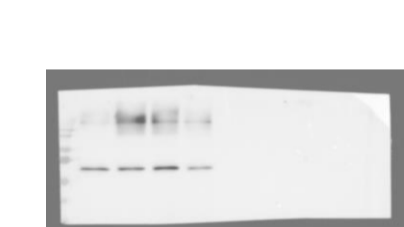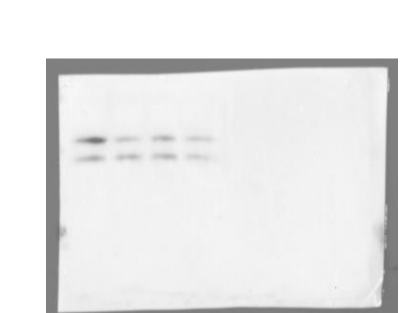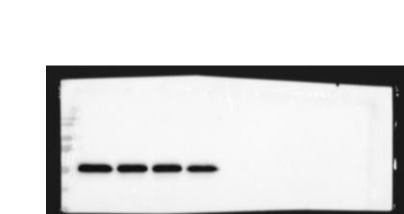

MIA PaCa-2 cells  
- 0.25 0.5 1

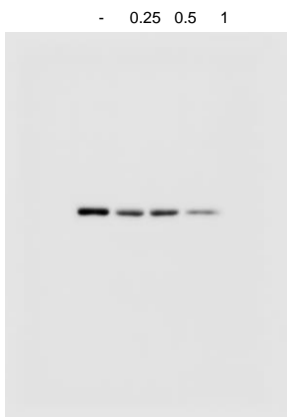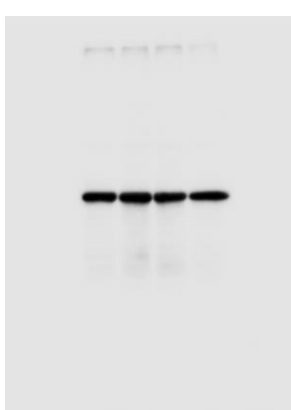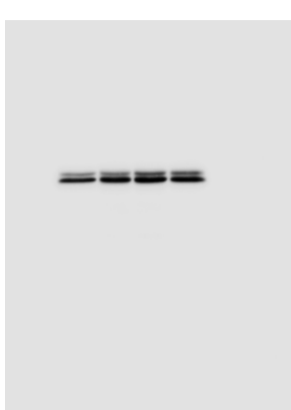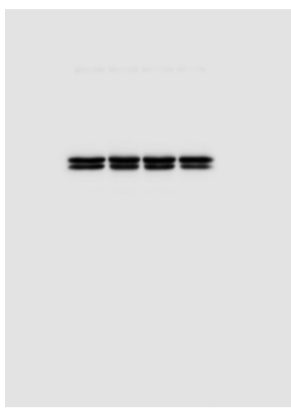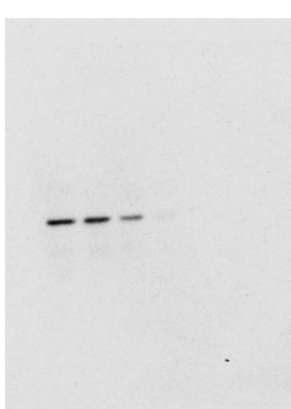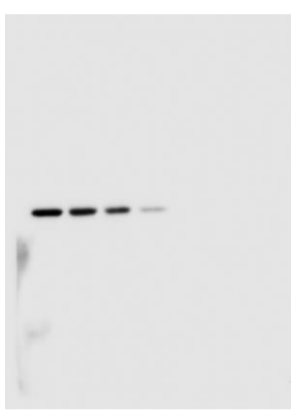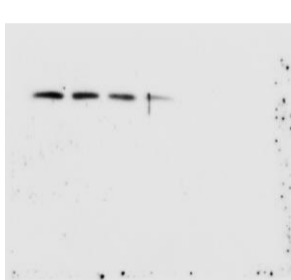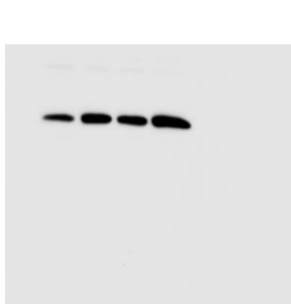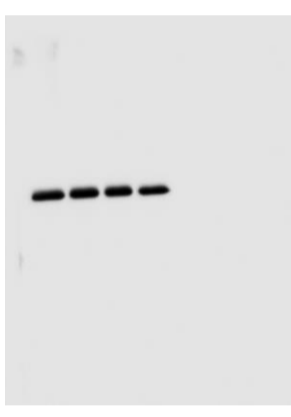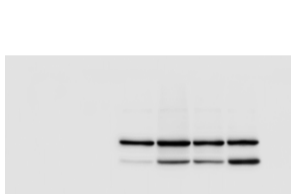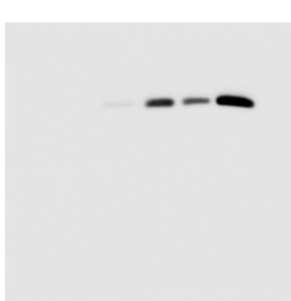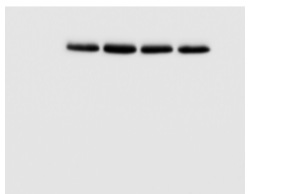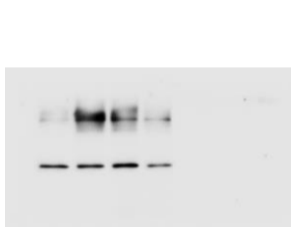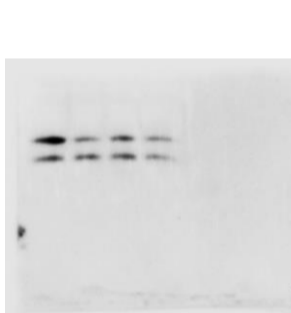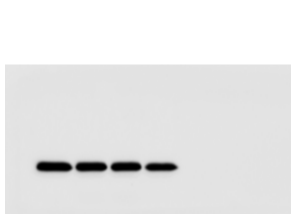

PANC-1 cells  
- 0.25 0.5 1

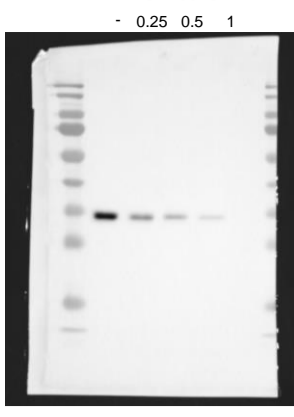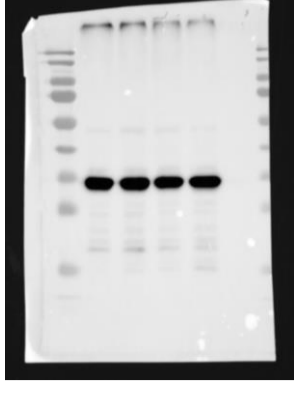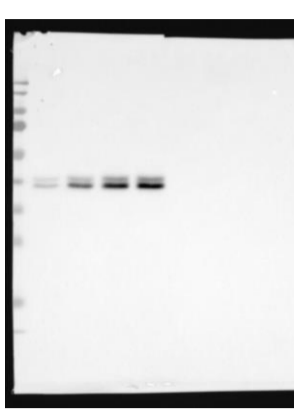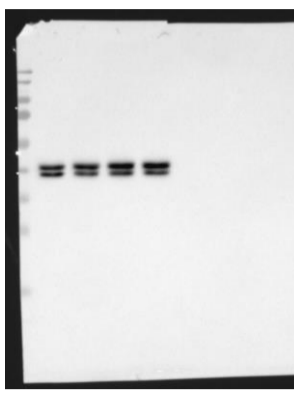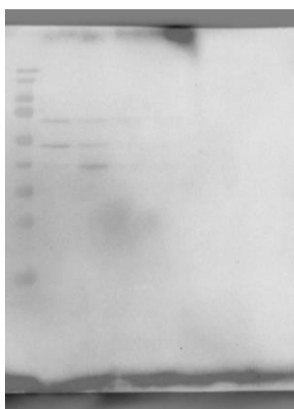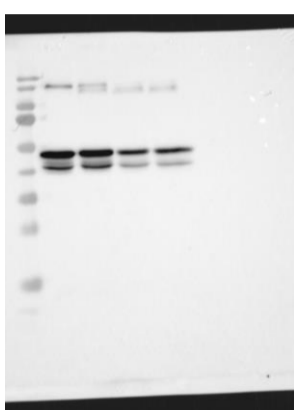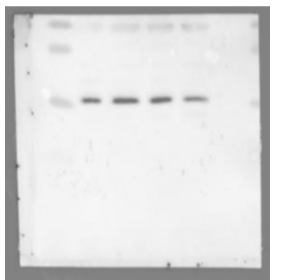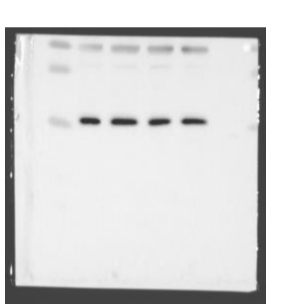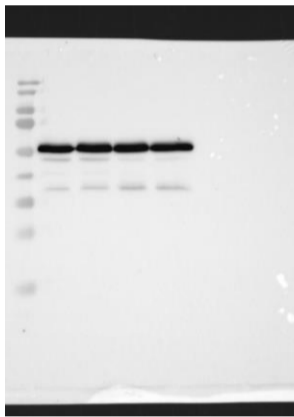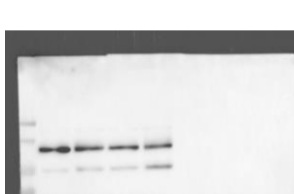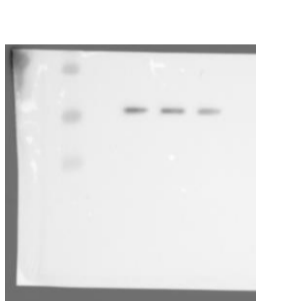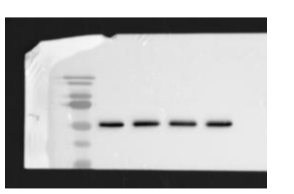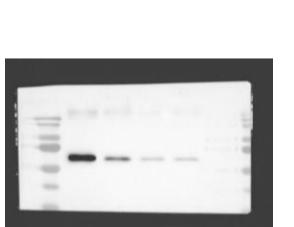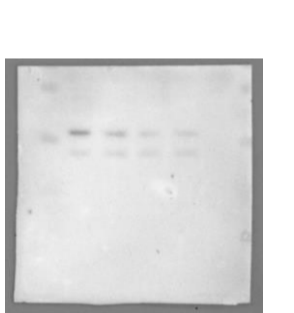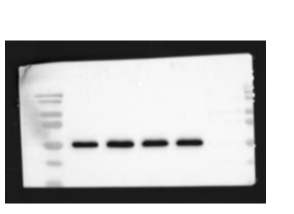

PANC-1 cells  
- 0.25 0.5 1

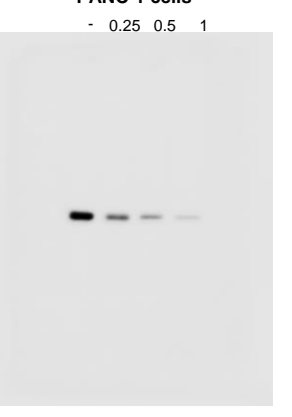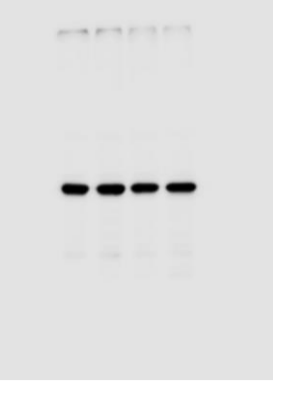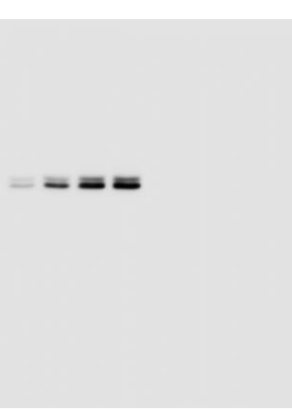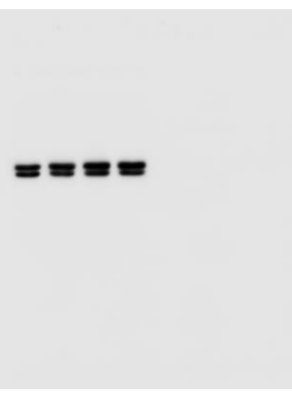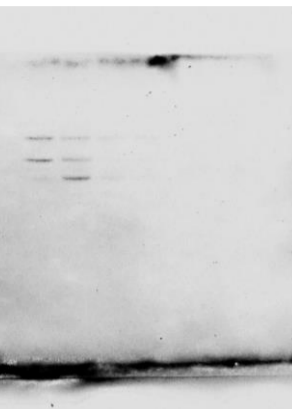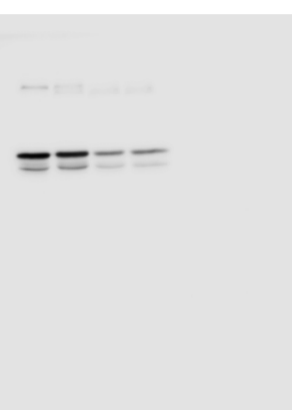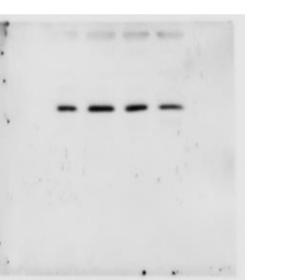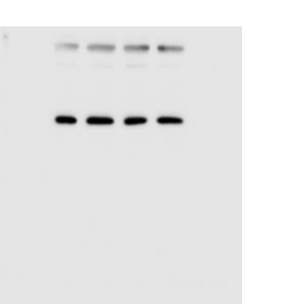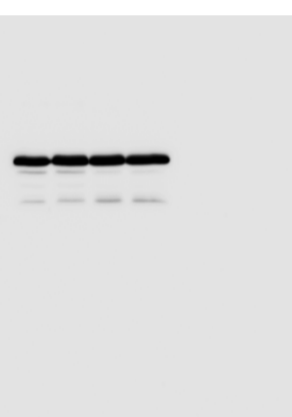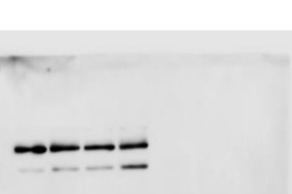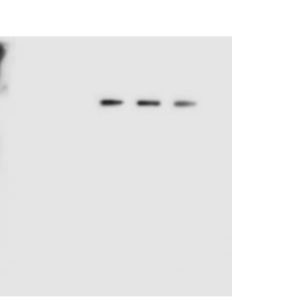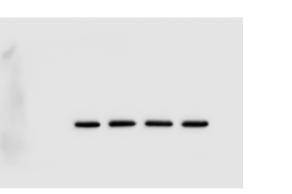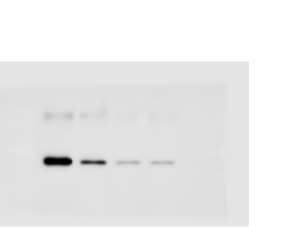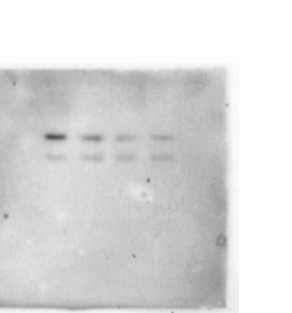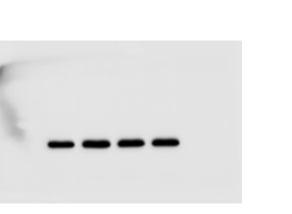

AsPC-1 cells  
- 0.25 0.5 1

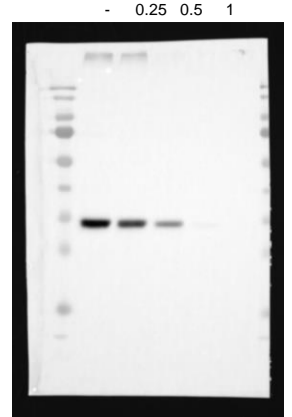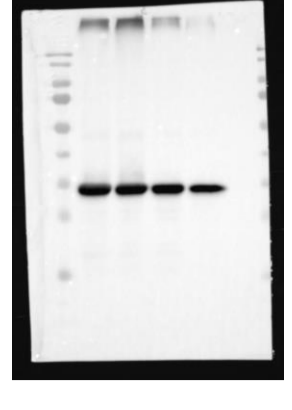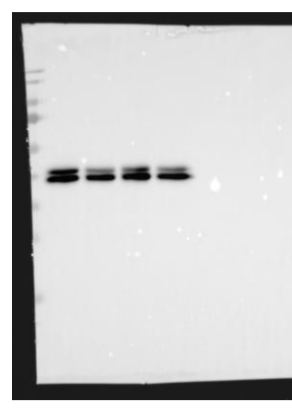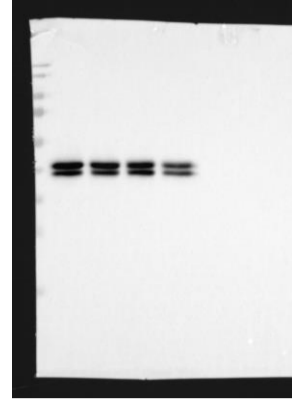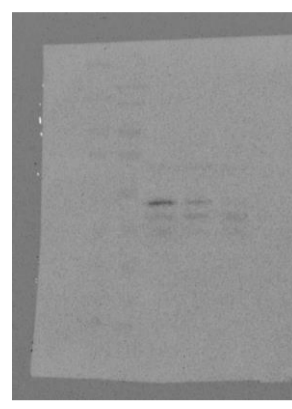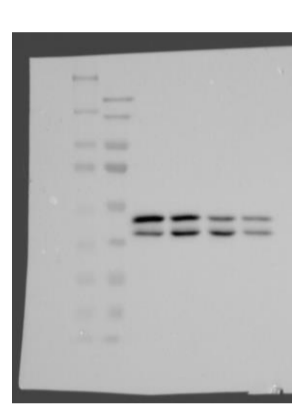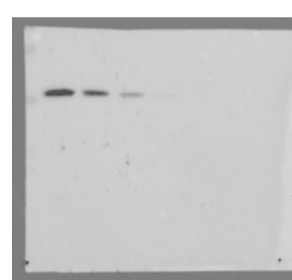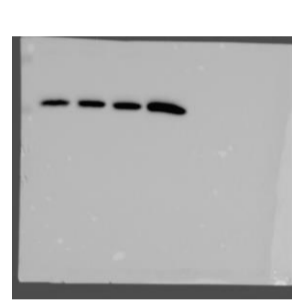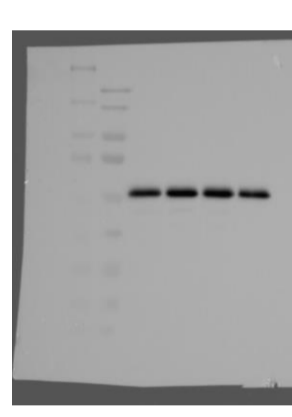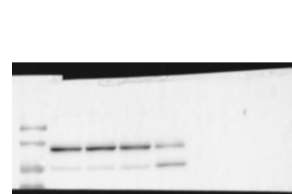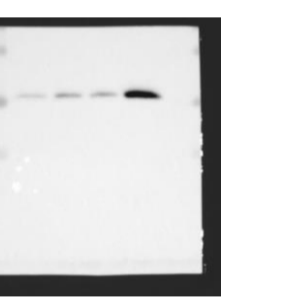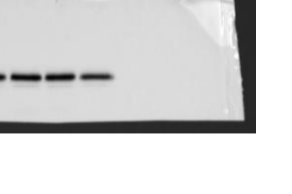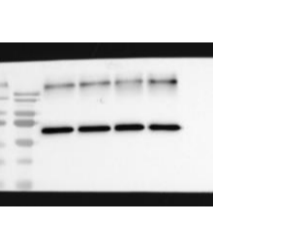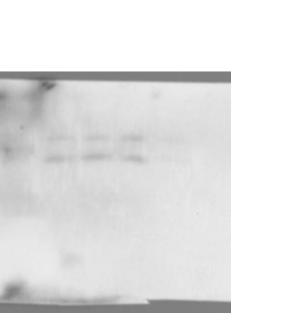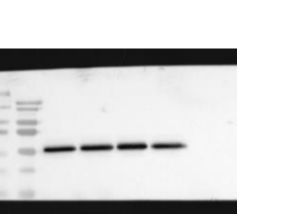

AsPC-1 cells  
- 0.25 0.5 1

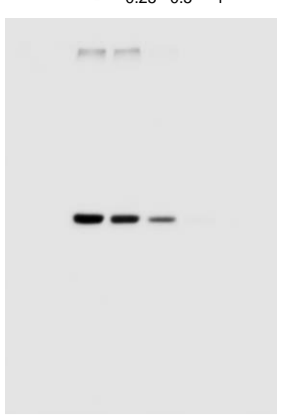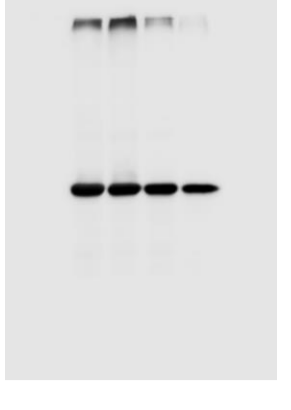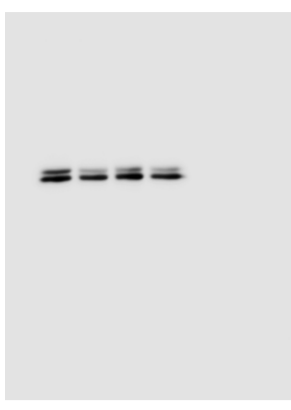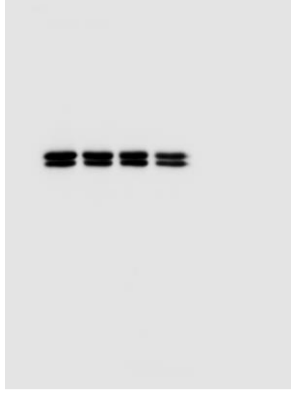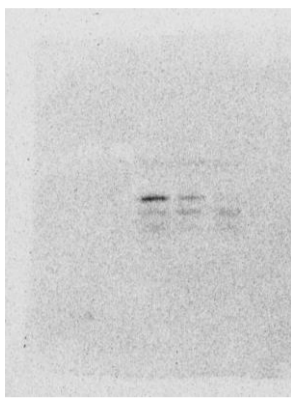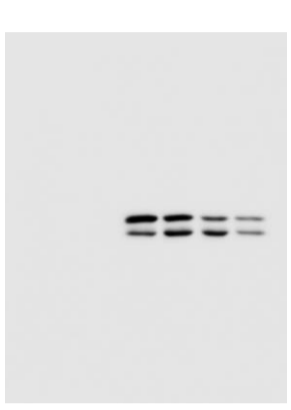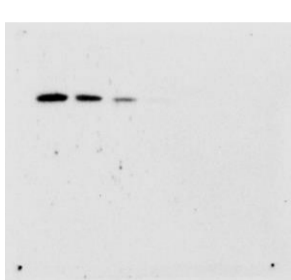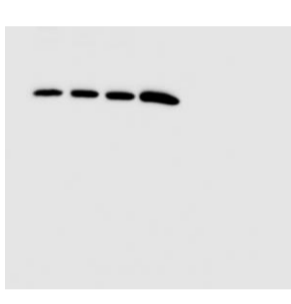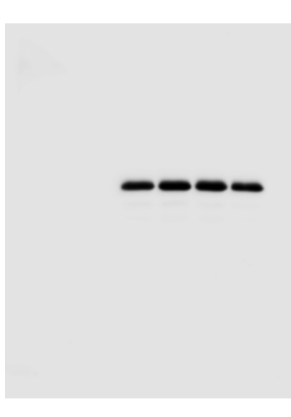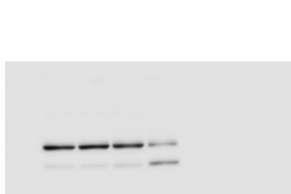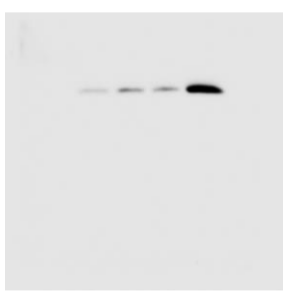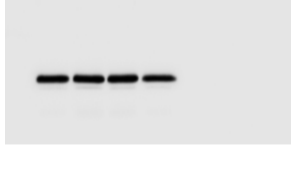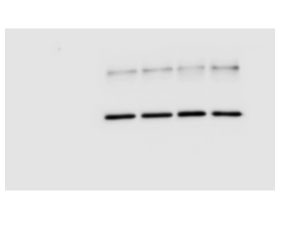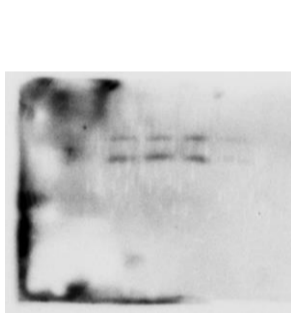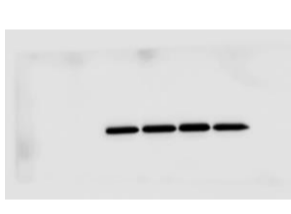

**IB: p-RPS6**  
36 kDa

**IB: RPS6**  
36 kDa

**IB: p-ERK1/2**  
42,44 kDa

**IB: ERK1/2**  
42, 44 kDa

**IB: p-AURKA/B/C**  
36-48 kDa

**IB: AURKA**  
48 kDa

**IB: p-Histone H3**  
15 kDa

**IB: Histone H3**  
15 kDa

**IB: α-tubulin**  
55 kDa

**IB: PARP1**  
89, 116 kDa

**IB: γH2AX**  
15 kDa

**IB: α-tubulin**  
55 kDa

**IB: SQSTM1/p62**  
62 kDa

**IB: LC3B**  
14,19 kDa

**IB: α-tubulin**  
55 kDa

**IB: p-CHK1**  
56 kDa

**IB: CHK1**  
56 kDa

**IB: α-tubulin**  
55 kDa

**IB: p-CHK2**  
56 kDa

**IB: CHK2**  
56 kDa

**IB: α-tubulin**  
55 kDa

PANC-1 cells  
AD80 (μM) - 1 - 1  
Bafilomycin A1 (nM) - - 10 10

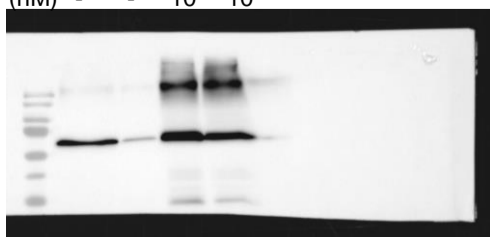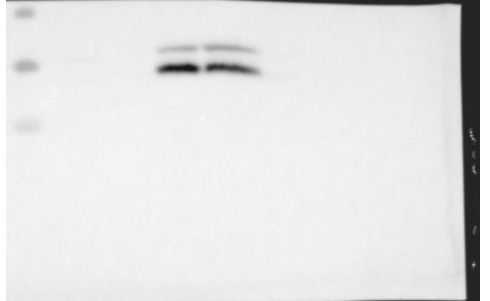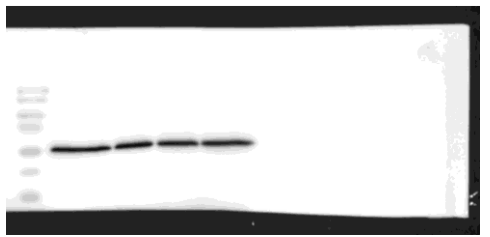

PANC-1 cells  
AD80 (μM) - 1 - 1  
Bafilomycin A1 (nM) - - 10 10

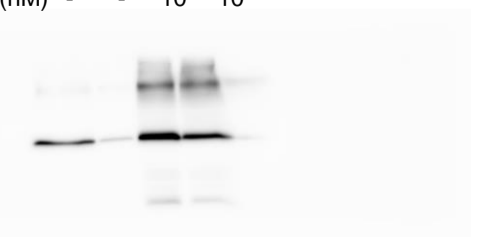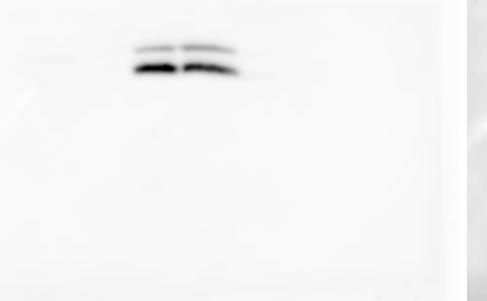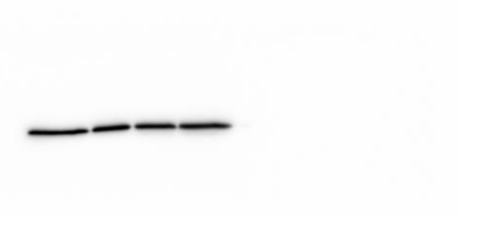

**IB: SQSTM1/p62**  
62 kDa

**IB: LC3B**  
14,19 kDa

**IB: α-tubulin**  
55 kDa
