# Supplementary figures and images for: The Multikinase Inhibitor AD80 Induces Mitotic Catastrophe and Autophagy in Pancreatic Cancer Cells
Source: MDPI journal article supplement (doi:10.3390/cancers15153866), 2023-07-29

A

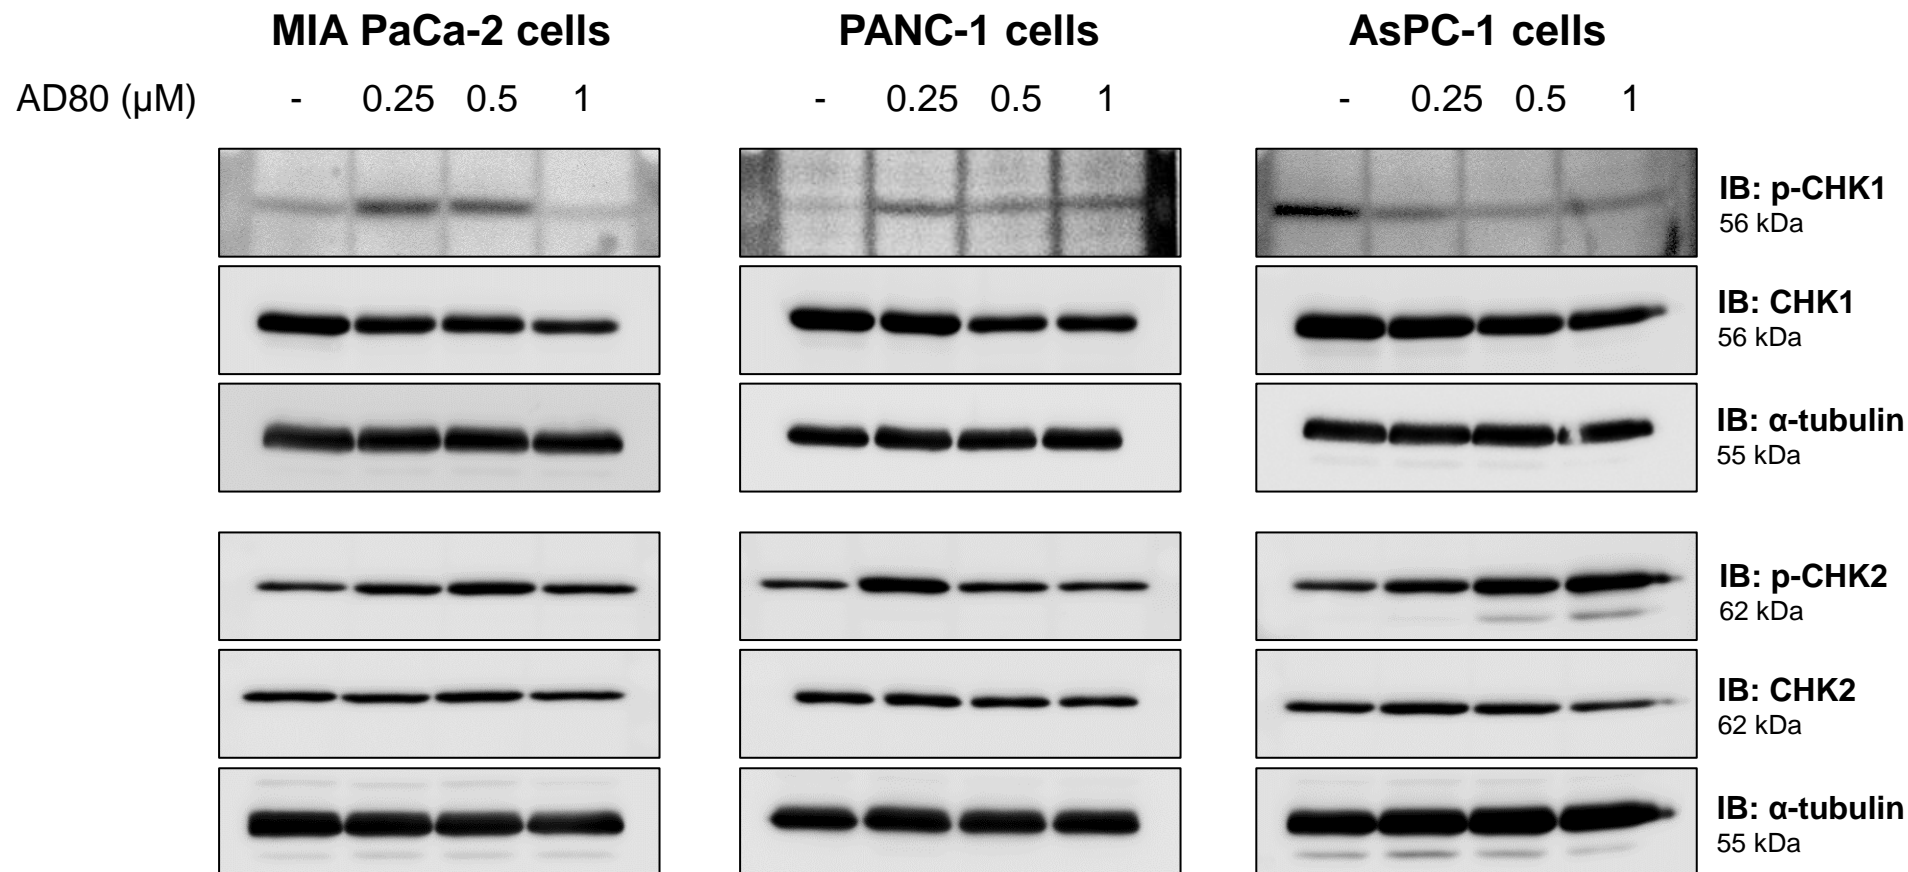

B

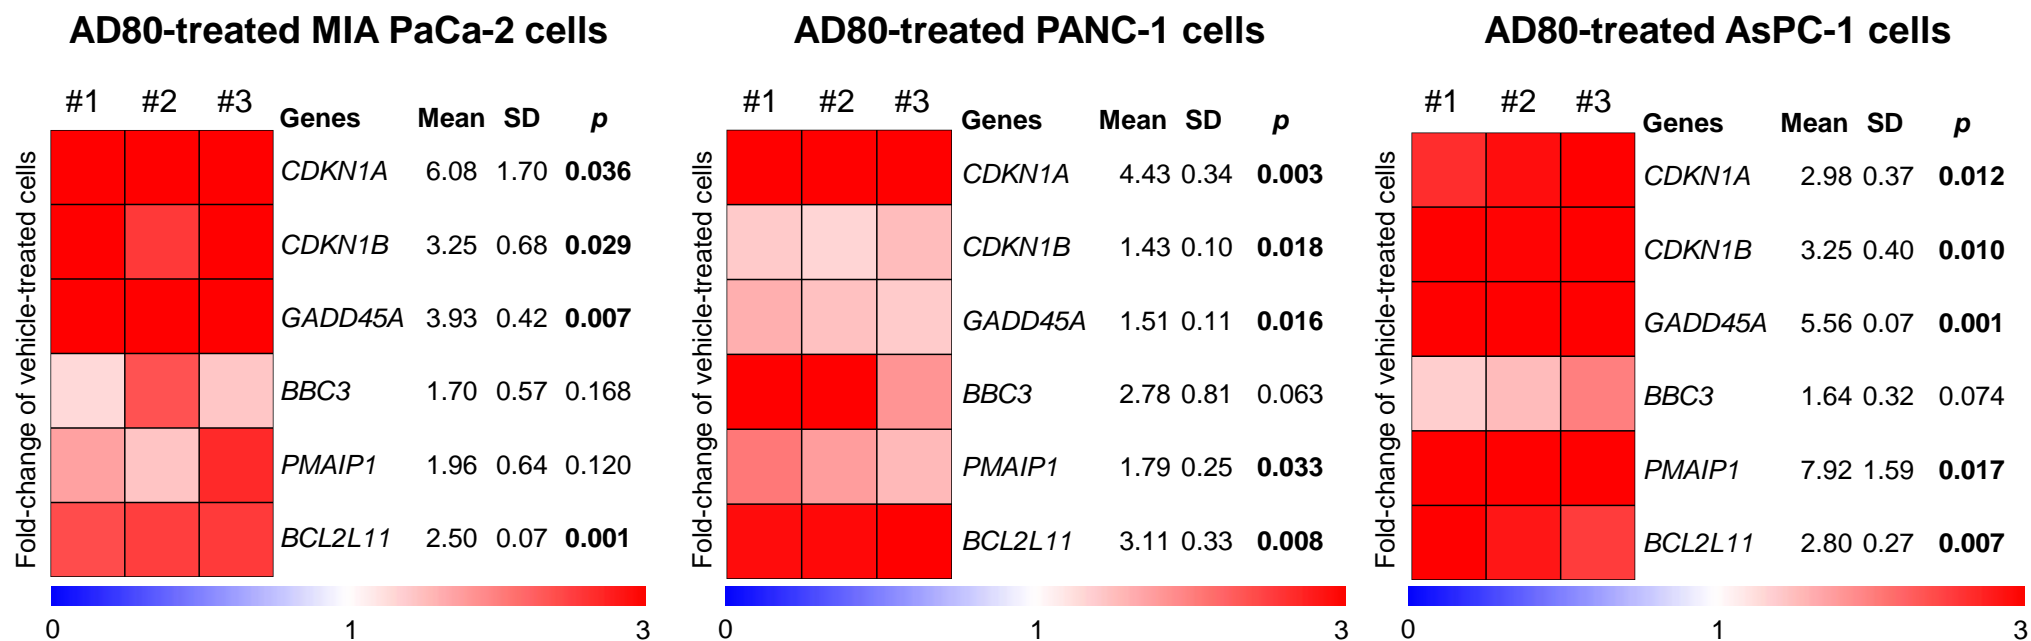

Supplement: s1 [file s1]
